# Supplementary material
Source: Frontiers journal article supplement (https://www.frontiersin.org/articles/459893)
Supplement: Data_Sheet_1.pdf [file Data_Sheet_1.pdf]

Supplementary Information

**The farnesyltransferase  $\beta$ -subunit Ram1 regulates  
*Sporisorium scitamineum* mating, pathogenicity and cell wall  
integrity**

Shuquan Sun, Yi Zhen Deng, Enping Cai, Meixin Yan, Lingyu Li, Baoshan Chen,  
Changqing Chang\*, Zide Jiang\*

\* To whom correspondence should be addressed. Email: [zdjiang@scau.edu.cn](mailto:zdjiang@scau.edu.cn) (Zide Jiang) or [changcq@scau.edu.cn](mailto:changcq@scau.edu.cn) (Changqing Chang)

**This PDF file includes**  
Figure and Table Legends

Figure S1

**A**

|                          |     |           |            |             |           |            |         |           |            |          |           |            |            |            |        |
|--------------------------|-----|-----------|------------|-------------|-----------|------------|---------|-----------|------------|----------|-----------|------------|------------|------------|--------|
| <i>S. scitaneum</i>      | 1   | MPAIAAMP  | SFLNVPCT   | SDQQTTEA    | INALEP    | LRP        | SEDEPDS | N--SHANL  | PALS       | AEQD     | QAEASSG   | QAEHILL    | EQAHNEIL   | QAEPLIG    | QAEHNE |
| <i>S. reilianum</i>      | 1   | MPAIAAMP  | SFLNVPCT   | SDQQTTEA    | INALEP    | LRP        | SEDEPDS | N--SHANL  | PALS       | AEQD     | QAEASSG   | QAEHILL    | EQAHNEIL   | QAEPLIG    | QAEHNE |
| <i>U. hronivora</i>      | 1   | MPAIAAMP  | SFLNVPCT   | SDQQTTEA    | INALEP    | LRP        | SEDEPDS | N--SHANL  | PALS       | AEQD     | QAEASSG   | QAEHILL    | EQAHNEIL   | QAEPLIG    | QAEHNE |
| <i>U. maydis</i>         | 1   | MPAIAAMP  | SFLNVPCT   | SDQQTTEA    | INALEP    | LRP        | SEDEPDS | N--SHANL  | PALS       | AEQD     | QAEASSG   | QAEHILL    | EQAHNEIL   | QAEPLIG    | QAEHNE |
| <i>U. hordei</i>         | 1   | MPAIAAMP  | SFLNVPCT   | SDQQTTEA    | INALEP    | LRP        | SEDEPDS | N--SHANL  | PALS       | AEQD     | QAEASSG   | QAEHILL    | EQAHNEIL   | QAEPLIG    | QAEHNE |
| <i>M. pennsylvanicum</i> | 1   | MPAIAAMP  | SFLNVPCT   | SDQQTTEA    | INALEP    | LRP        | SEDEPDS | N--SHANL  | PALS       | AEQD     | QAEASSG   | QAEHILL    | EQAHNEIL   | QAEPLIG    | QAEHNE |
| <i>S. scitaneum</i>      | 129 | LSVSLRGR  | APAIATLSP  | QAIAGGGG    | GFDCQHLMA | TIYAVSALAI | GGGCAFT | ELIAGRSVE | VGGGNDIT   | RGMVWIS  | IQPDGSEIL | HYNGEVDEVA | QYCVCI     |            |        |
| <i>S. reilianum</i>      | 122 | LSVSLRGR  | APAIATLSP  | QAIAGGGG    | GFDCQHLMA | TIYAVSALAI | GGGCAFT | ELIAGRSVE | VGGGNDIT   | RGMVWIS  | IQPDGSEIL | HYNGEVDEVA | QYCVCI     |            |        |
| <i>U. hronivora</i>      | 130 | LSVSLRGR  | APAIATLSP  | QAIAGGGG    | GFDCQHLMA | TIYAVSALAI | GGGCAFT | ELIAGRSVE | VGGGNDIT   | RGMVWIS  | IQPDGSEIL | HYNGEVDEVA | QYCVCI     |            |        |
| <i>U. maydis</i>         | 127 | LSVSLRGR  | APAIATLSP  | QAIAGGGG    | GFDCQHLMA | TIYAVSALAI | GGGCAFT | ELIAGRSVE | VGGGNDIT   | RGMVWIS  | IQPDGSEIL | HYNGEVDEVA | QYCVCI     |            |        |
| <i>U. hordei</i>         | 130 | LSVSLRGR  | APAIATLSP  | QAIAGGGG    | GFDCQHLMA | TIYAVSALAI | GGGCAFT | ELIAGRSVE | VGGGNDIT   | RGMVWIS  | IQPDGSEIL | HYNGEVDEVA | QYCVCI     |            |        |
| <i>M. pennsylvanicum</i> | 127 | LSVSLRGR  | APAIATLSP  | QAIAGGGG    | GFDCQHLMA | TIYAVSALAI | GGGCAFT | ELIAGRSVE | VGGGNDIT   | RGMVWIS  | IQPDGSEIL | HYNGEVDEVA | QYCVCI     |            |        |
| <i>S. scitaneum</i>      | 259 | QNFASQCO  | TYEGGIAAAS | QFTYQ--HYA  | DGGISL    | QED        | VPP     | LGEAH     | GGTYCAAS   | HALSLDS  | LGSSN     | ---DPRAA   | LPLAQ      | HRD        |        |
| <i>S. reilianum</i>      | 252 | QNFASQCO  | TYEGGIAAAS | QFTYQ--RAA  | DGGISL    | QED        | VPP     | LGEAH     | GGTYCAAS   | HALSLDS  | LGSSN     | ---DPRAA   | LPLAQ      | HRD        |        |
| <i>U. hronivora</i>      | 260 | QNFASQCO  | TYEGGIAAAS | QFTYQ--DTN  | DGGISL    | QED        | VPP     | LGEAH     | GGTYCAAS   | HALSLDS  | LGSSN     | ---DPRAA   | LPLAQ      | HRD        |        |
| <i>U. maydis</i>         | 257 | QNFASQCO  | TYEGGIAAAS | QFTYQ--ASA  | DGGISL    | QED        | VPP     | LGEAH     | GGTYCAAS   | HALSLDS  | LGSSN     | ---DPRAA   | LPLAQ      | HRD        |        |
| <i>U. hordei</i>         | 260 | QNFASQCO  | TYEGGIAAAS | QFTYQ--DTN  | DGGISL    | QED        | VPP     | LGEAH     | GGTYCAAS   | HALSLDS  | LGSSN     | ---DPRAA   | LPLAQ      | HRD        |        |
| <i>M. pennsylvanicum</i> | 257 | QNFASQCO  | TYEGGIAAAS | QFTYQ--DTN  | DGGISL    | QED        | VPP     | LGEAH     | GGTYCAAS   | HALSLDS  | LGSSN     | ---DPRAA   | LPLAQ      | HRD        |        |
| <i>S. scitaneum</i>      | 384 | YGNFSGGLF | TVLSAMIEP  | LIEDAN--RST | ASCPAYVH  | DNGMLTVP   | QVLA    | AFSD      | SSSG--SNKT | ESMTSADE | -----     | SDA        | AID--CDLSP | TLFERVGLGR |        |
| <i>S. reilianum</i>      | 375 | YGNFSGGLF | TVLSAMIEP  | LIEDAN--RST | ASCPAYVH  | DNGMLTVP   | QVLA    | AFSD      | SSSG--SNKT | ESMTSADE | -----     | SDA        | AID--CDLSP | TLFERVGLGR |        |
| <i>U. hronivora</i>      | 375 | YGNFSGGLF | TVLSAMIEP  | LIEDAN--RST | ASCPAYVH  | DNGMLTVP   | QVLA    | AFSD      | SSSG--SNKT | ESMTSADE | -----     | SDA        | AID--CDLSP | TLFERVGLGR |        |
| <i>U. maydis</i>         | 375 | YGNFSGGLF | TVLSAMIEP  | LIEDAN--RST | ASCPAYVH  | DNGMLTVP   | QVLA    | AFSD      | SSSG--SNKT | ESMTSADE | -----     | SDA        | AID--CDLSP | TLFERVGLGR |        |
| <i>U. hordei</i>         | 375 | YGNFSGGLF | TVLSAMIEP  | LIEDAN--RST | ASCPAYVH  | DNGMLTVP   | QVLA    | AFSD      | SSSG--SNKT | ESMTSADE | -----     | SDA        | AID--CDLSP | TLFERVGLGR |        |
| <i>M. pennsylvanicum</i> | 385 | YGNFSGGLF | TVLSAMIEP  | LIEDAN--RST | ASCPAYVH  | DNGMLTVP   | QVLA    | AFSD      | SSSG--SNKT | ESMTSADE | -----     | SDA        | AID--CDLSP | TLFERVGLGR |        |
| <i>S. scitaneum</i>      | 504 | GRPLAYHTC | YNGRGLISO  | HSVLSTES    | GRHCHREG  | DE-----    | NR      | KVNMMLANT | LSARGEVVE  | AREAGD   | NRNPHH    | MTTEFRAN   | MDAYGQ     |            |        |
| <i>S. reilianum</i>      | 495 | GRPLAYHTC | YNGRGLISO  | HSVLSTES    | GRHCHREG  | DE-----    | NR      | KVNMMLANT | LSARGEVVE  | AREAGD   | NRNPHH    | MTTEFRAN   | MDAYGQ     |            |        |
| <i>U. hronivora</i>      | 493 | GRPLAYHTC | YNGRGLISO  | HSVLSTES    | GRHCHREG  | DE-----    | NR      | KVNMMLANT | LSARGEVVE  | AREAGD   | NRNPHH    | MTTEFRAN   | MDAYGQ     |            |        |
| <i>U. maydis</i>         | 515 | GRPLAYHTC | YNGRGLISO  | HSVLSTES    | GRHCHREG  | DE-----    | NR      | KVNMMLANT | LSARGEVVE  | AREAGD   | NRNPHH    | MTTEFRAN   | MDAYGQ     |            |        |
| <i>U. hordei</i>         | 493 | GRPLAYHTC | YNGRGLISO  | HSVLSTES    | GRHCHREG  | DE-----    | NR      | KVNMMLANT | LSARGEVVE  | AREAGD   | NRNPHH    | MTTEFRAN   | MDAYGQ     |            |        |
| <i>M. pennsylvanicum</i> | 499 | GRPLAYHTC | YNGRGLISO  | HSVLSTES    | GRHCHREG  | DE-----    | NR      | KVNMMLANT | LSARGEVVE  | AREAGD   | NRNPHH    | MTTEFRAN   | MDAYGQ     |            |        |

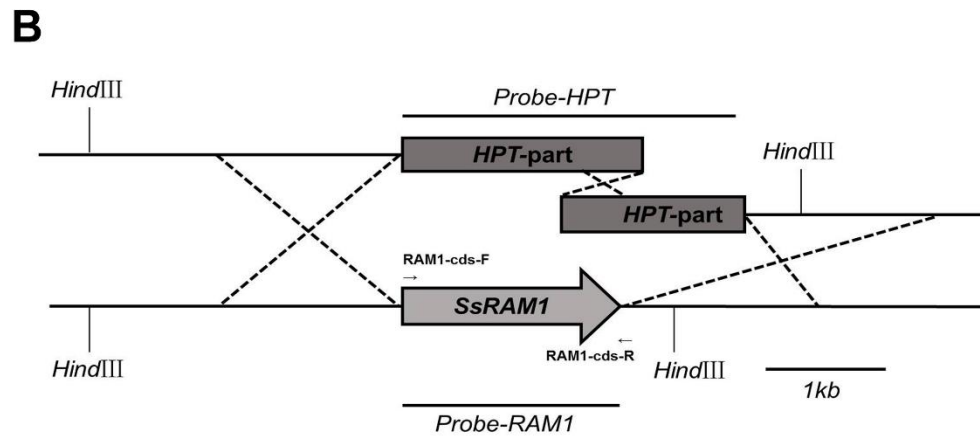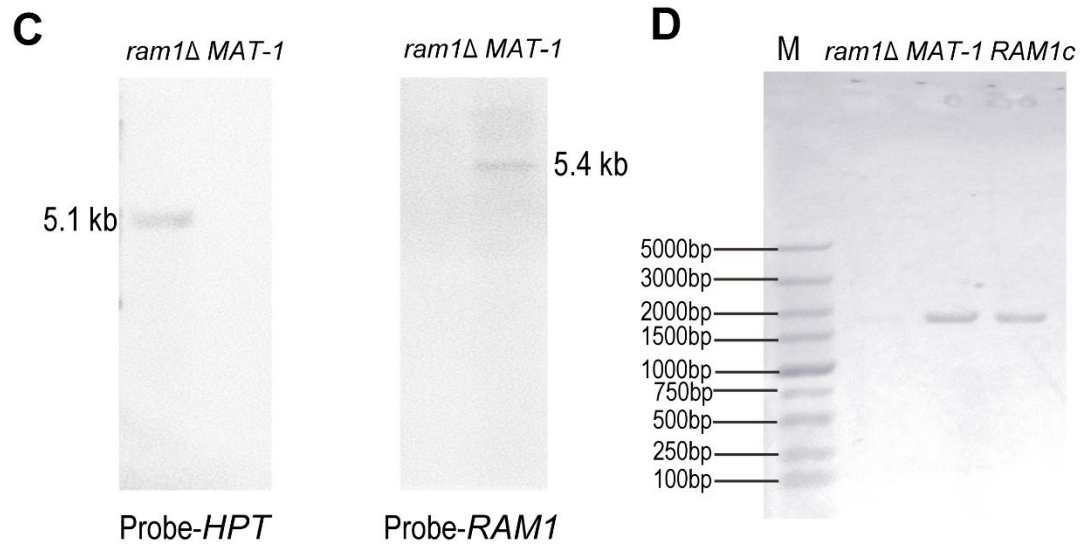

**Figure S1 Construction and identification of *S. scitamineum ram1*Δ and *RAM1c*.**

(A) Amino acid sequences arrangement with *S. scitamineum* Ram1 protein and its orthologs in smut fungi by ClustalX2.0 and BioEdit. The black and grey shadow denoted identical and conserved residues respectively. The red boxes represent prenyltransferase and a squalene oxidase repeat (PF00432.16). (B) Schematic representation of generation of two partial-overlapped fragments with *HPT* resistant marker in replacement of *RAM1* gene locus. Solid lines represent sequences flanking *RAM1* gene, and dashed lines for the region where homologous recombination occurs. Localization of restriction enzyme *HindIII* and DNA fragments used as probes in Southern blot analysis in (C) were denoted. The scheme was drawn to scale with scale bar = 1 kb. (C) Southern blot to confirm *RAM1* gene deletion. Genomic DNA from wild-type (*MAT-1*) or selected transformant was digested with *HindIII*, and then probed with the *HPT* or *RAM1* fragment respectively. *HPT*-probing detected no band for the wild-type strain as expected, and a single band of 5.1 kb, diagnostic as *ram1*Δ mutant. *RAM1*-probing detected no band for *ram1*Δ mutant, confirming successful deletion of this gene, and a single band of 5.4 kb consistent with the calculated size resulted from specific gene replacement. (D) PCR verification of *ram1*Δ mutant and complimentary *RAM1c* strain, using the primer pair RAM1-cds-F/RAM1-cds-R, as denoted in (B).

Figure S2

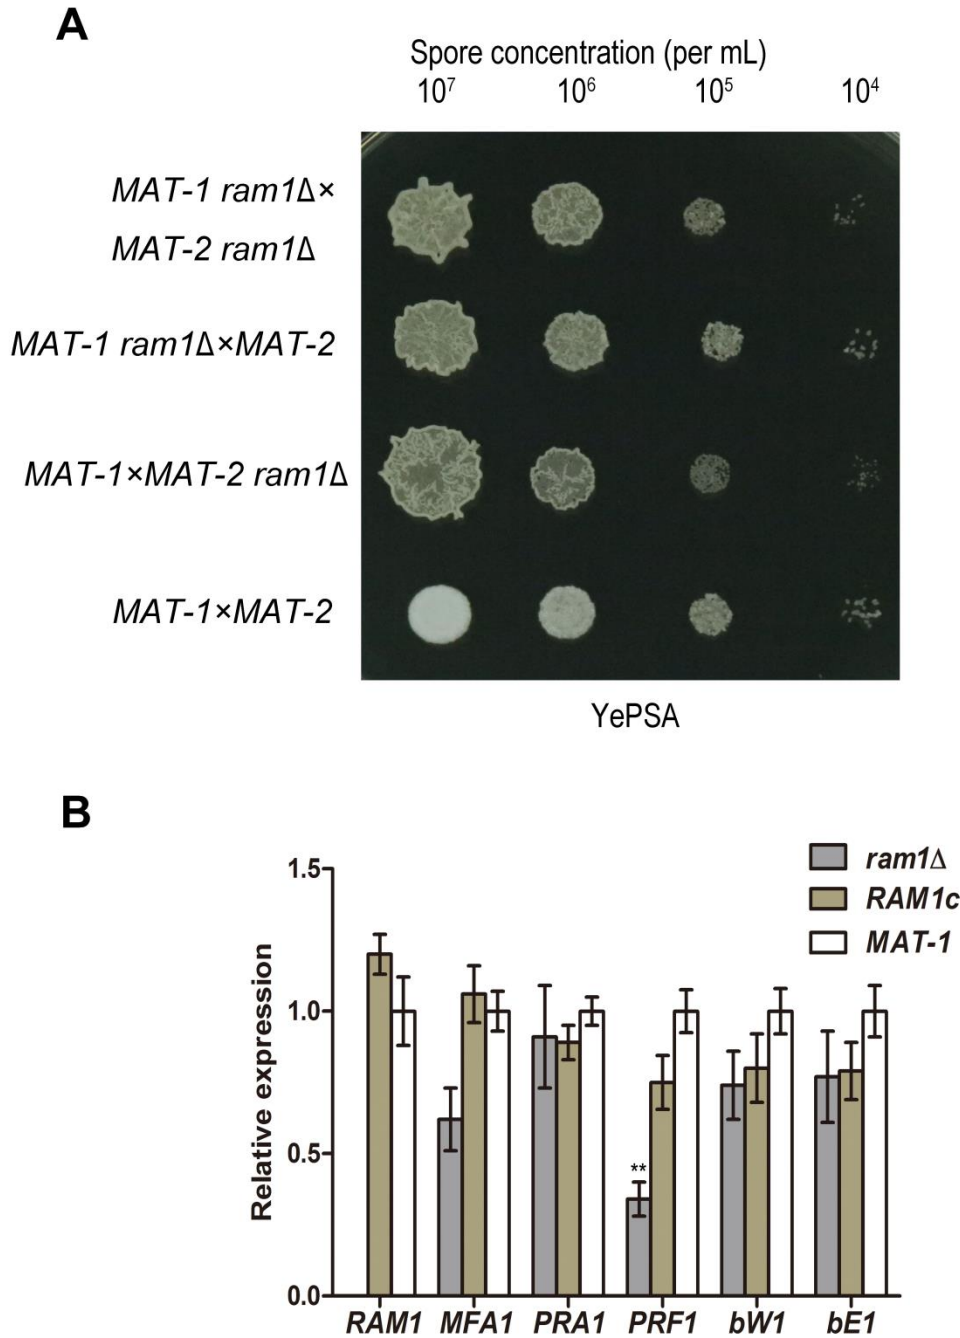

**Figure S2 *RAM1* regulates *S. scitamineum* mating/filamentation.**

(A) A sporidial suspension (1  $\mu$ L) of OD<sub>600</sub>=1.0, and the serial 10-fold dilutions of indicated strains, were spotted on YePSA plates and incubated at 28 °C for 48 h, before examination and photographed. (B) qRT-PCR analysis of genes related to fungal mating and filamentation, in *ram1* $\Delta$  mutant compared to wild-type *MAT-1* or the complementation strain *RAM1c*. Sporidia were allowed to grow on YePSA plate for 36 h before total RNA extraction. Gene expression in the wild-type was set as 1 and the relative gene expression fold change in mutant or complementary strain was calculated with  $2^{-\Delta\Delta C_t}$  method (Livak and Schmittgen 2001) using *ACTIN* as internal control. Statistical significance of the gene relative expressions was determined at  $p < 0.01$  (\*\*) using Student's t-test, and mean  $\pm$  standard deviation was derived from three independent biological replicates.

**Figure S3**

**A**

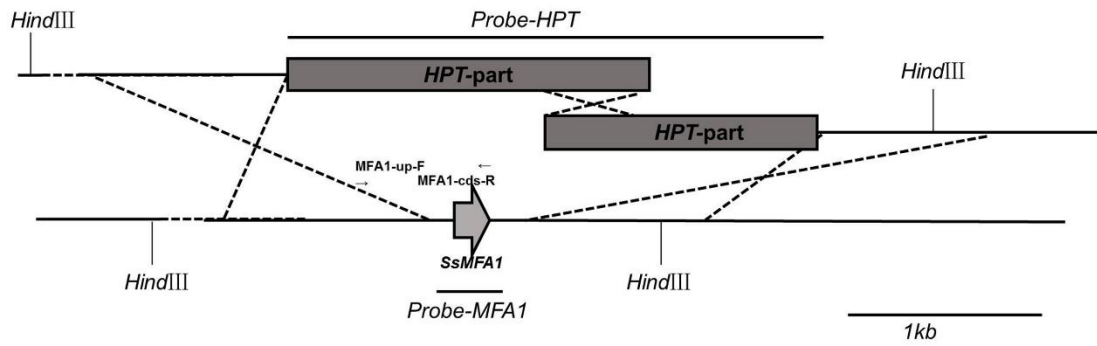

**B**

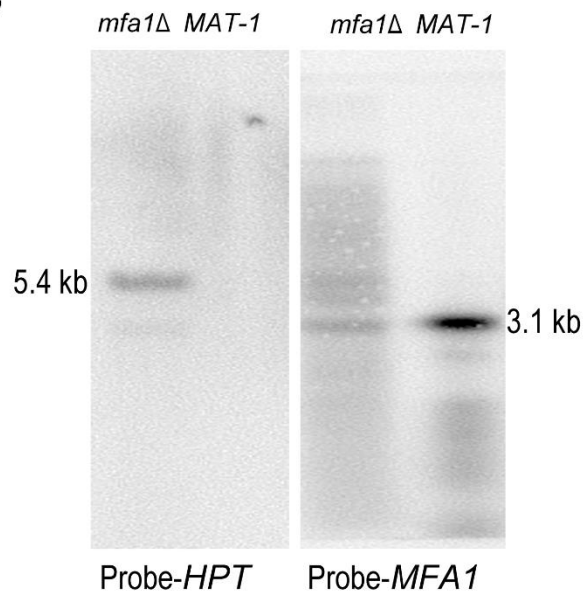

**C**

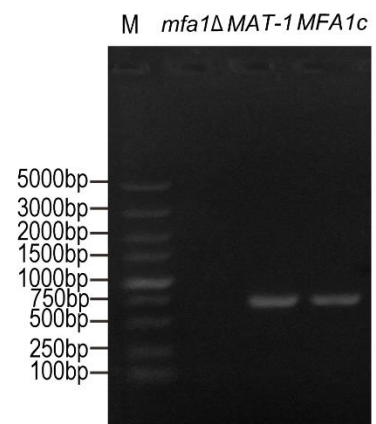

**Figure S3 Construction and identification of *S. scitamineum mfa1Δ* and *MFA1c* .**

(A) Schematic representation of generation of two partial-overlapped fragments with *HPT* resistant marker in replacement of *MFA1* gene locus. Solid lines represent sequences flanking *MFA1* gene, and dashed lines for the region where homologous recombination occurs. Localization of restriction enzyme *HindIII* and DNA fragments used as probes in Southern blot analysis in (B) were denoted. The scheme was drawn to scale with scale bar = 1 kb. (B) Southern blot to confirm *MFA1* gene deletion. Genomic DNA from wild-type (*MAT-1*) or selected transformant was digested with *HindIII*, and then probed with the *HPT* or *MFA1* fragment respectively. *HPT*-probing detected no band for the wild-type strain as expected, and a single band of 5.4 kb, diagnostic as *mfa1Δ* mutant. *MFA1*-probing detected no band for *mfa1Δ* mutant, confirming successful deletion of this gene, and a single band of 3.1 kb consistent with the calculated size resulted from specific gene replacement. (C) PCR verification of *mfa1Δ* mutant and complimentary *MFA1c* strain, using the primer pair MFA1-up-F /MFA1-cds-R, as denoted in (A).

Figure S4

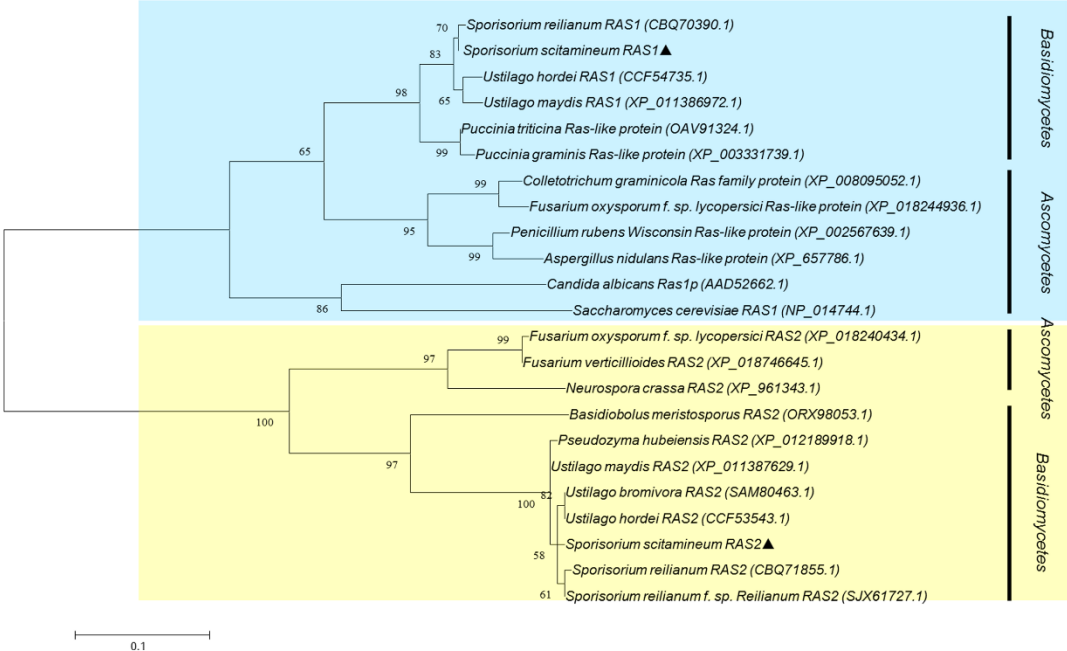



**Figure S4 Phylogenetic analysis with Ras1, Ras2 proteins and their orthologs.**

Phylogenetic analysis of fungal orthologous Ras1 proteins and Ras2 proteins. Amino acid sequences were aligned with ClustalX 2.0 with the following parameters: pairwise alignment parameters (gap opening = 10, gap extension = 0.1) and multiple alignment parameters (gap opening = 10, gap extension = 0.2, transition weight = 0.5, delay divergent sequences = 25%). The alignment was phylogenetically analyzed with maximum likelihood by MEGA 6.0, by using a Le-Gasquel amino acid replacement matrix with 1,000 bootstrap replications. *S. scitamineum* Ras1 and Ras2 proteins were denoted by solid triangles.

Figure S5

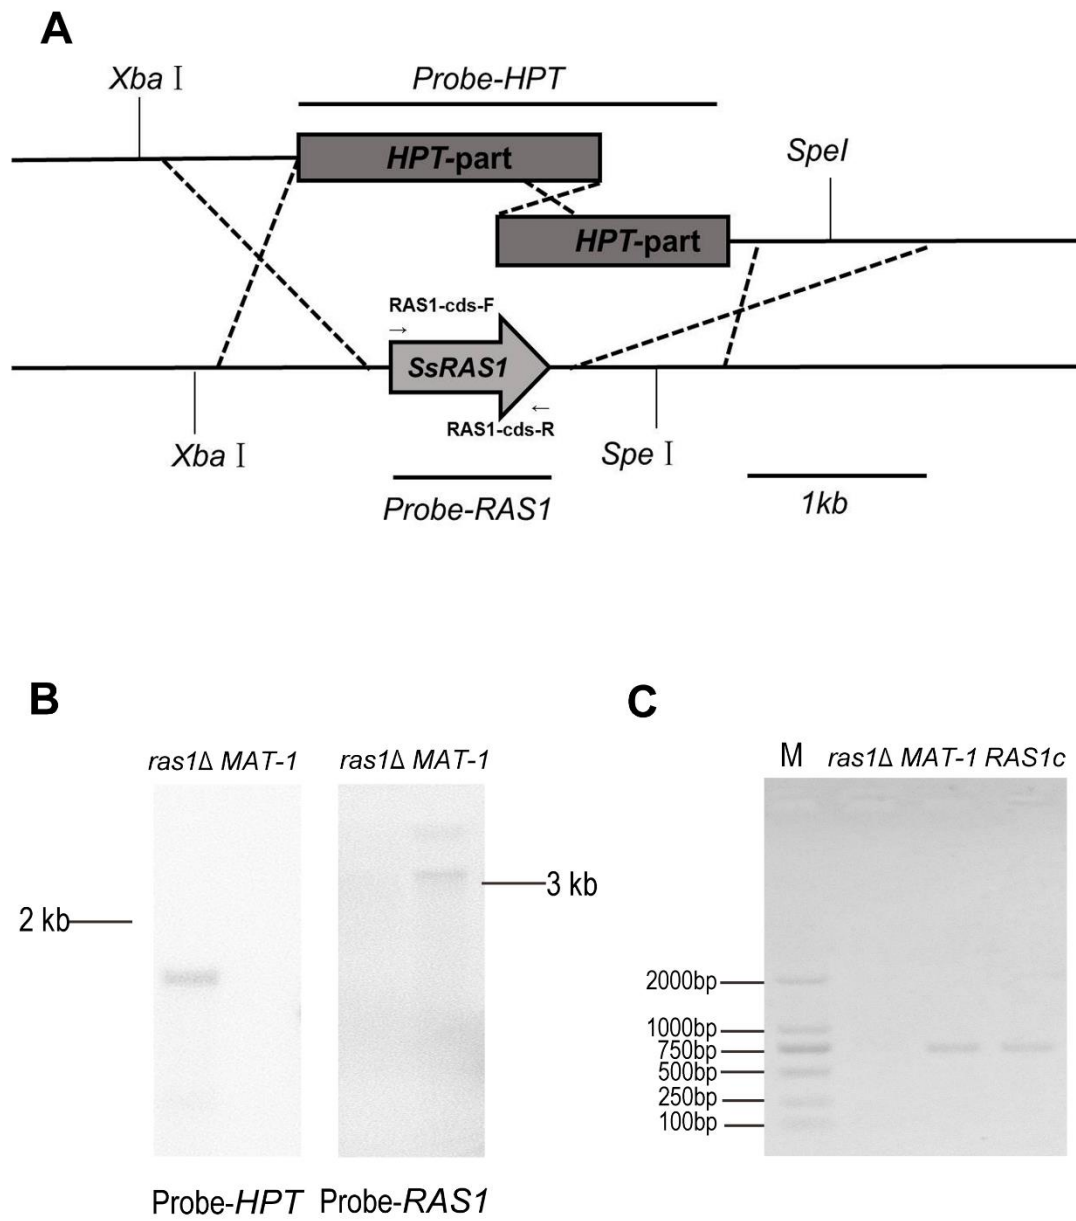

**Figure S5 Construction and identification of *S. scitamineum* *ras1*Δ and *RAS1c*.**

(A) Schematic representation of generation of two partial-overlapped fragments with *HPT* resistant marker in replacement of *RAS1* gene locus. Solid lines represent sequences flanking *RAS1* gene, and dashed lines for the region where homologous recombination occurs. Localization of restriction enzyme *Xba*I and *Spe*I and DNA fragments used as probes in Southern blot analysis in (B) were denoted. The scheme was drawn to scale with scale bar = 1 kb. (B) Southern blot to confirm *RAS1* gene deletion. Genomic DNA from wild-type (*MAT-1*) or selected transformant was digested with *Xba*I and *Spe*I, and then probed with the *HPT* or *RAM1* fragment respectively. *HPT*-probing detected no band for the wild-type strain as expected, and a single band of 4.3 kb, diagnostic as *ras1*Δ mutant. *RAS1*-probing detected no band for *ras1*Δ mutant, confirming successful deletion of this gene, and a single band of 3.1 kb consistent with the calculated size resulted from specific gene replacement. (C) PCR verification of *ras1*Δ mutant and complimentary *RAS1c* strain, using the primer pair RAS1-cds-F/RAS1-cds-R, as denoted in (A).

**Figure S6**

**A**

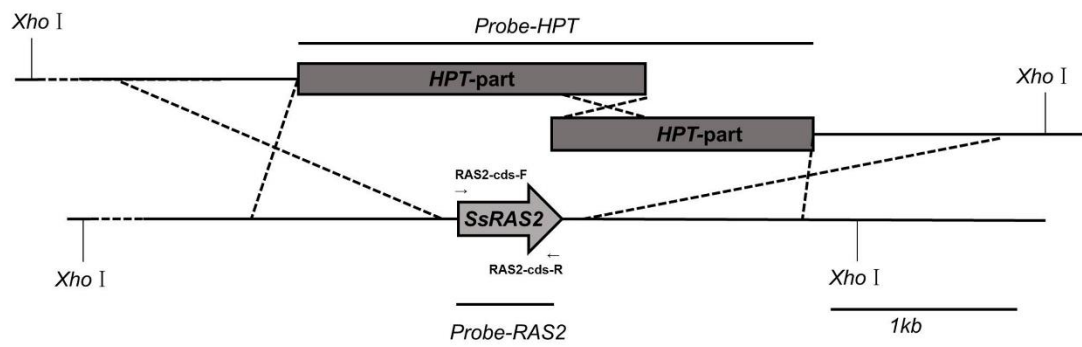

**B**

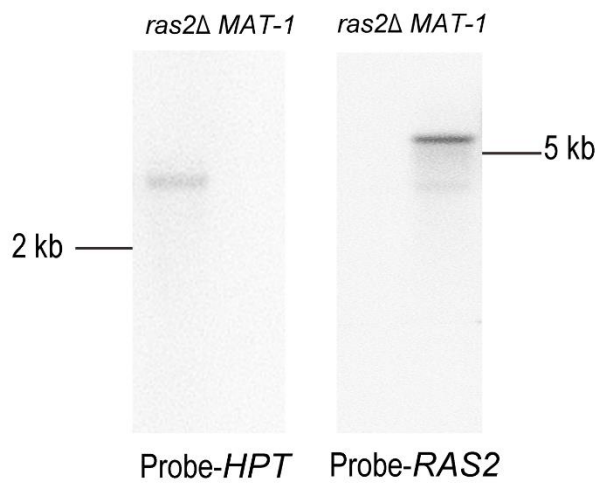

**C**

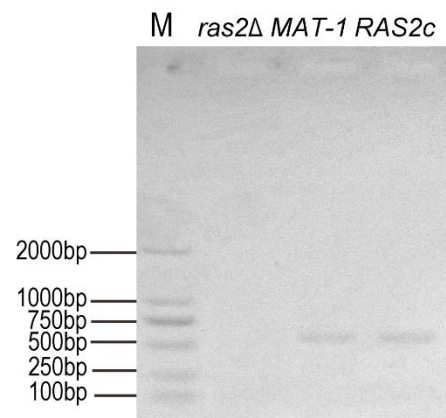

**Figure S6 Construction and identification of *S. scitamineum* *ras2*Δ and *RAS2c*.**

(A) Schematic representation of generation of two partial-overlapped fragments with *HPT* resistant marker in replacement of *RAS2* gene locus. Solid lines represent sequences flanking *RAS2* gene, and dashed lines for the region where homologous recombination occurs. Localization of restriction enzyme *Xho*I and DNA fragments used as probes in Southern blot analysis in (B) were denoted. The scheme was drawn to scale with scale bar = 1 kb. (B) Southern blot to confirm *RAS2* gene deletion. Genomic DNA from wild-type (*MAT-1*) or selected transformant was digested with *Xho*I, and then probed with the *HPT* or *RAS2* fragment respectively. *HPT*-probing detected no band for the wild-type strain as expected, and a single band of 5.3 kb, diagnostic as *ras2* Δ mutant. *RAS2*-probing detected no band for *ram1*Δ mutant, confirming successful deletion of this gene, and a single band of 5.7 kb consistent with the calculated size resulted from specific gene replacement. (C) PCR verification of *ras2*Δ mutant and complimentary *RAS2c* strain, using the primer pair *RAS2*-cds-F/*RAS2*-cds-R, as denoted in (A).

**Figure S7**

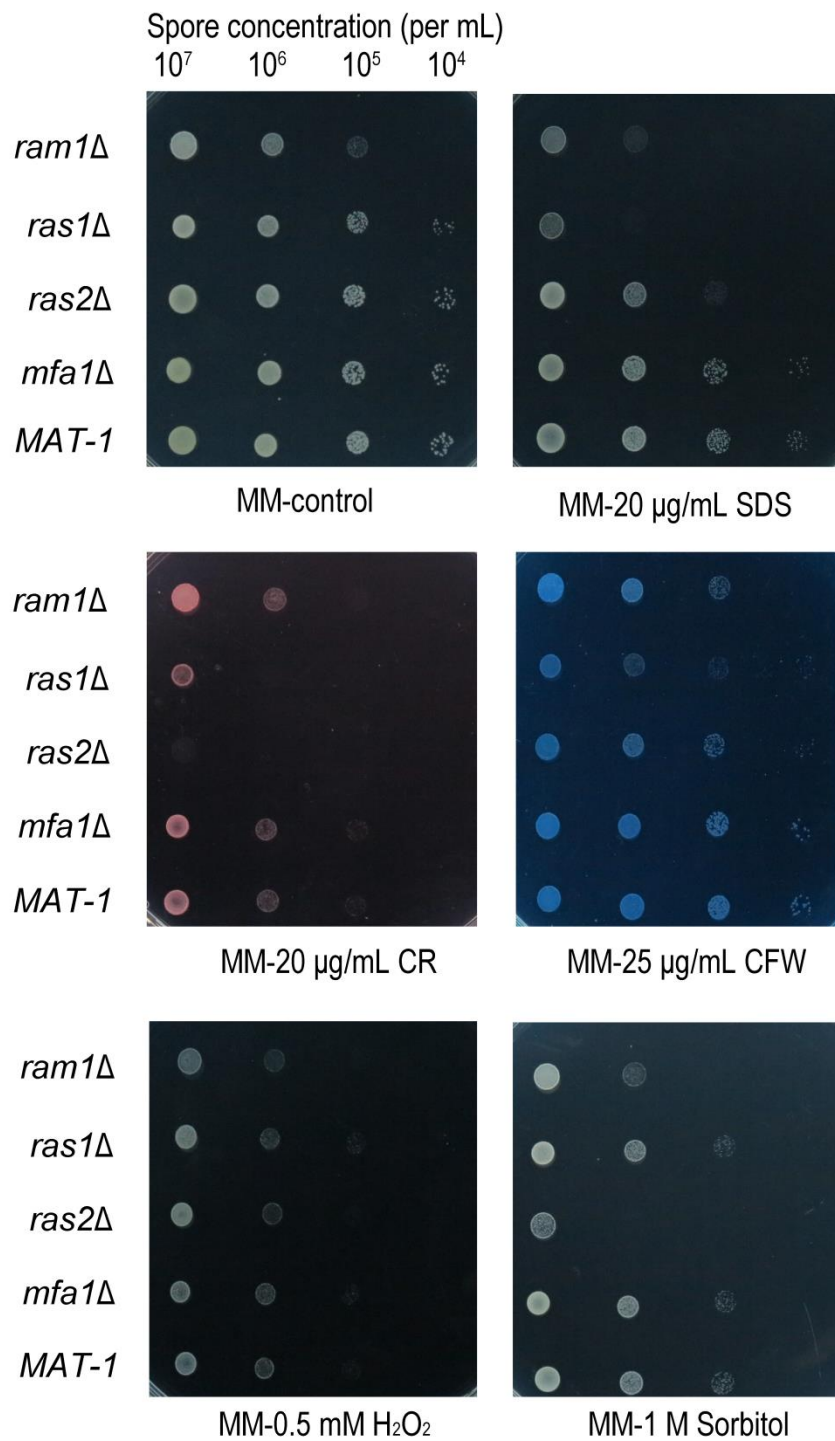

**Figure S7 Stress tolerance assessment.**

A sporidial suspension (1  $\mu$ L) of OD<sub>600</sub>=1.0, and the serial 10-fold dilutions of *ram1* $\Delta$ , *ras1* $\Delta$ , *ras2* $\Delta$ , *mfa1* $\Delta$  mutants and wild-type *MAT-1* strains, were spotted on MM plates in the absence or presence of stress inducers, including 20  $\mu$ g/mL Congo red, 25  $\mu$ g/mL calcofluor white, 20  $\mu$ g/mL SDS, 1 M Sorbitol and 0.5 mM H<sub>2</sub>O<sub>2</sub>, incubated in dark at 28 °C for 48 h before examination.

**Figure S8**

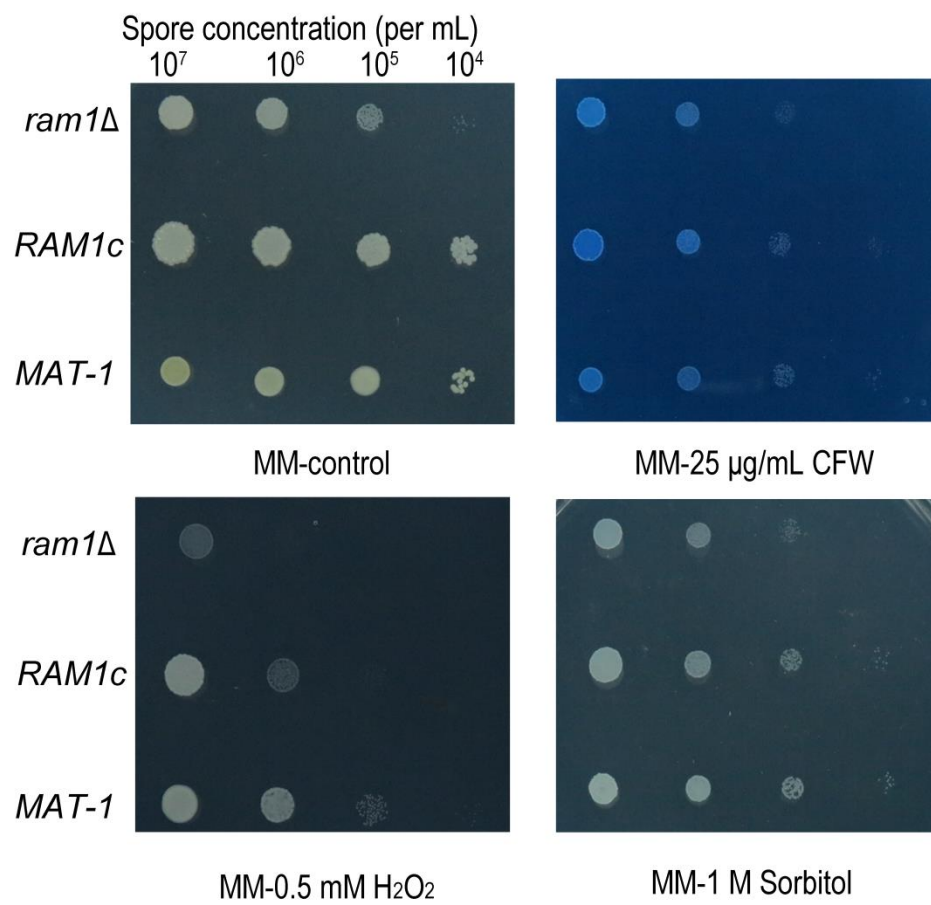



**Figure S8 Assessment of stress tolerance with *ram1*Δ and *RAM1c*.**

A sporidial suspension (1 μL) of OD<sub>600</sub>=1.0, and the serial 10-fold dilutions of *ram1*Δ, wild-type *MAT-1* and *RAM1c* strains, were spotted on MM plates in the absence or presence of stress inducers, including 25 μg/mL calcofluor white, 1 M Sorbitol and 0.5 mM H<sub>2</sub>O<sub>2</sub>, incubated in dark at 28 °C for 48 h before examination.

**Figure S9**

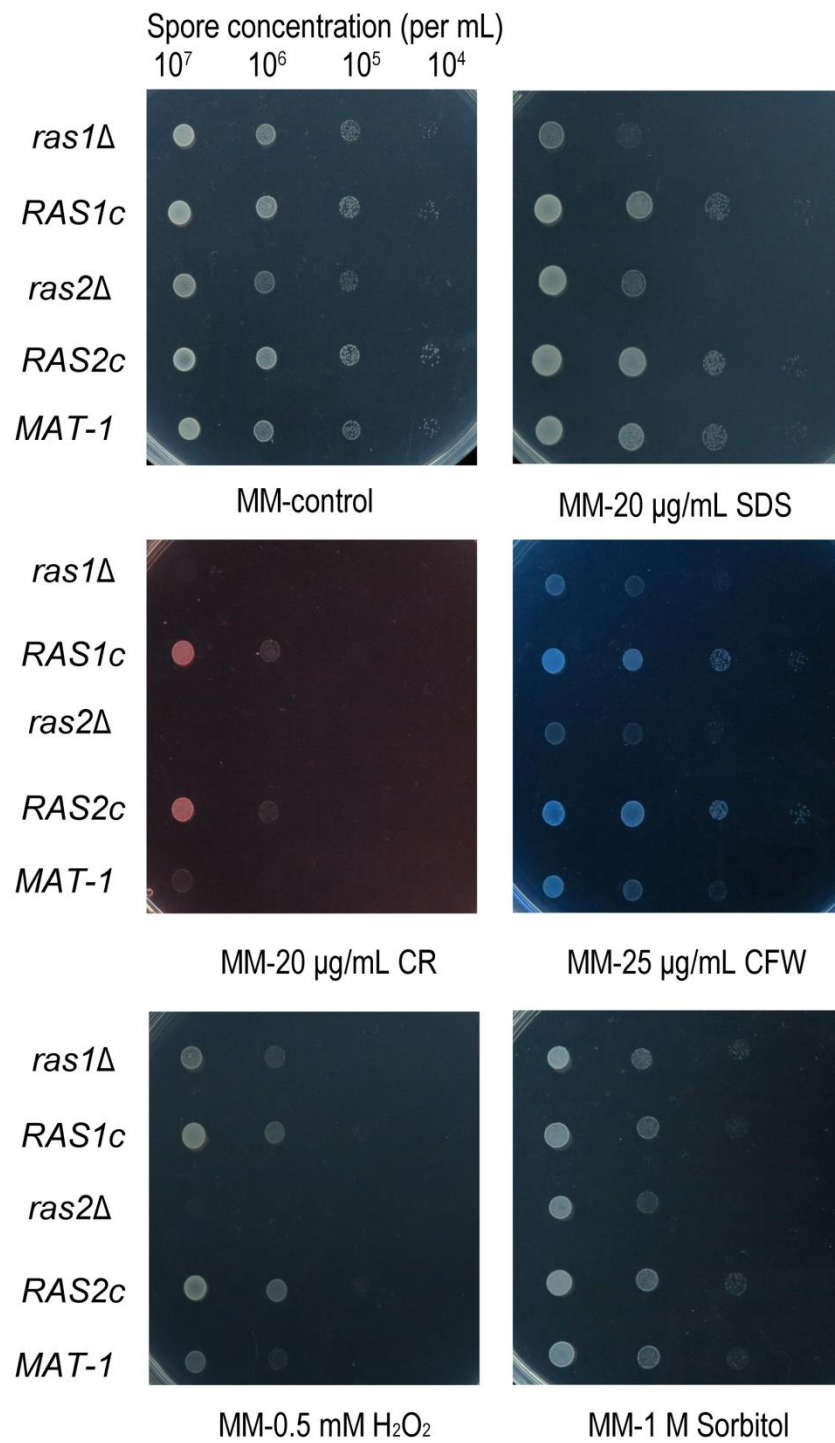

**Figure S9 Assessment of stress tolerance with *ras1*Δ, *ras2*Δ, *RAS1c* and *RAS2c* .**

A sporidial suspension (1 μL) of OD<sub>600</sub>=1.0, and the serial 10-fold dilutions of *ras1*Δ, *ras2*Δ, *RAS1c*, *RAS2c* and wild-type *MAT-1* strains were spotted on MM plates in the absence or presence of stress inducers, including 20 μg/mL Congo red , 25 μg/mL calcofluor white, 20 μg/mL SDS , 1 M Sorbitol and 0.5 mM H<sub>2</sub>O<sub>2</sub>, incubated in dark at 28 °C for 48 h before examination.

**Table S1 List of target genes in this study**

| <b>Gene name</b> | <b>Description</b>                  | <b>GenBank accession</b>     |
|------------------|-------------------------------------|------------------------------|
| <i>RAM1</i>      | Beta subunit of farnesyltransferase | CP010926.1:<br>349030-350847 |
| <i>MFA1</i>      | Mating pheromone                    | CP010914.1:<br>857085-857204 |
| <i>RAS1</i>      | Small G-protein                     | CP010916.1:<br>737829-738566 |
| <i>RAS2</i>      | Small G-protein                     | CP010915.1:<br>596219-596794 |

**Table S2 List of primers used for targeted gene deletion and complementary**

| Primer name  | Primer sequences (5'to3')                    | Description                                         |
|--------------|----------------------------------------------|-----------------------------------------------------|
| RAM1-LA-F    | GTGAATGGTGCATGGCATCGG                        | Deletion construction of <i>RAM1</i>                |
| RAM1-LAHPT-R | GTCGTGACTGGGAAAACCCTGAGGCAAGAGGCAGCGTCAA     |                                                     |
| RAM1-HPTRA-F | GGTCATAGCTGTTTCCTGTGTGAAGCGAATCTGTGCTTGCGGA  |                                                     |
| RAM1-RA-R    | GCATCCACTGCGAATCGGC                          |                                                     |
| 225-F        | GCAAGACCTGCCTGAAACCG                         |                                                     |
| 226-R        | GGTCAAGACCAATGCGGAGC                         |                                                     |
| M13F         | CAGGGTTTTCCCAGTCACGAC                        |                                                     |
| M13R         | TCACACAGGAAACAGCTATGACC                      | Deletion/ Complementary verification of <i>RAM1</i> |
| RAM1-cds-F   | GCGTATTGTACAGTGGTGGGTGA                      |                                                     |
| RAM1-cds-R   | CTCGATCGGTGGTCAGGCTTT                        |                                                     |
| RAM1-com-F   | TCCAAGCTCAAGCTAAGCTTTGAGTCGGCACTGCGTCAAA     | Complementary construction of <i>RAM1</i>           |
| RAM1-com-R   | AGCAAGATCTAATCAAGCTTAGTATGGCGCGAAGGTGCTT     |                                                     |
| RAS1-LA-F    | CAGGCCATTGTGTGGGACTGA                        | Deletion construction of <i>RAS1</i>                |
| RAS1-LAHPT-R | GTCGTGACTGGGAAAACCCTGGGTGATCCGGATGGCTGTTCT   |                                                     |
| RAS1-HPTRA-F | GGTCATAGCTGTTTCCTGTGTGACATCCGTGCGCCATTTGACC  |                                                     |
| RAS1-RA-R    | CGCGTCTGTGTTGCGAAGTT                         |                                                     |
| RAS1-cds-F   | ATGTCCAAGGCACAATTCTT                         | PCR verification/ Southern blotting probe           |
| RAS1-cds-R   | GAGAACCACGCAACCGCTG                          |                                                     |
| RAS1-com-F   | TCCAAGCTCAAGCTAAGCTTCAAGTCACACGAGCCCACGAT    | Complementary construction of <i>RAS1</i>           |
| RAS1-com-R   | CAGCAAGATCTAATCAAGCTGTTGCCTTCTTTGCTGCTGTGT   |                                                     |
| RAS2-LA-F    | ACATATCGTGTGCGCCCTGCC                        | Deletion construction of <i>RAS2</i>                |
| RAS2-LAHPT-R | GTCGTGACTGGGAAAACCCTGCACGCCTTCGATGGGTGCTA    |                                                     |
| RAS2-HPTRA-F | GGTCATAGCTGTTTCCTGTGTGATGTCAGCAGCAGTGGTGTGCG |                                                     |

|              |                                              |                                      |
|--------------|----------------------------------------------|--------------------------------------|
| RAS2-RA-R    | GACCGATGTACACCCGTTGTGA                       |                                      |
| RAS2-cds-F   | ATGAGTGGCAAAATGATGATCTAC                     | PCR verification/ Southern           |
| RAS2-cds-R   | AAGAATGTGGCAACGTGATTTCT                      | blotting probe                       |
| RAS2-com-F   | TCCAAGCTCAAGCTAAGCTTCCCACGGTGAGCGAAAGGAT     | Complementary construction of        |
| RAS2-com-R   | CAGCAAGATCTAATCAAGCTACCGTCGCACACTTCGCTT      | <i>RAS2</i>                          |
| MFA1-LA-F    | ACTTTGGCCACGGACTGGAC                         | Deletion construction of <i>MFA1</i> |
| MFA1-LAHPT-R | GTCGTGACTGGGAAAACCCTGTCCGTTGCGTGAATGGTTGC    |                                      |
| MFA1-HPTRA-F | GGTCATAGCTGTTTCCTGTGTGAACGGTGGATGTGATGACAGGG |                                      |
| MFA1-RA-R    | TCGCGGTGCTGACGAATGT                          |                                      |
| MFA1-up-F    | ATGCTTTCCATCTTTACCCA                         | PCR verification/ Southern           |
| MFA1-cds-R   | ACGGTGGATGTGATGACAGG                         | blotting probe                       |
| MFA1-com-F   | TCCAAGCTCAAGCTAAGCTTGGAGCTGACTGGAGACGACG     | Complementary construction of        |
| MFA1-com-R   | TCCAAGCTCAAGCTAAGCTTTACCGTCGCATGGGTACGTC     | <i>MFA1</i>                          |
| eGFP-F       | AAAACACTCTTCCACCAAGCTTGTGAGCAAGGGCGAGGAGC    | <i>ram1Δ/eGFP-RAM1</i>               |
| eGFPRAM1-R   | GCAGCTTTGATGGCTGGCATCTTGTACAGCTCGTCCATGCCGA  | construction                         |
| eGFPRAM1-F   | TCGGCATGGACGAGCTGTACAAGATGCCAGCCATCAAAGCTGC  |                                      |
| RAM1-R       | CAGCAAGATCTAATCAAGCTCGCTTGACCATAAGCCCAA      |                                      |

**Table S3 List of selected genes primers used for qRT-PCR**

| GenBank accession | Gene name    | Primer name  | Primer sequences (5'to3') |
|-------------------|--------------|--------------|---------------------------|
| CP010914.1        | <i>MFA1</i>  | MFA1-qPCR-F  | ATGCTTTCCATCTTTACCCAGA    |
| 857085-857204     |              | MFA1-qPCR-R  | GTGCAGCTAGAGTAGCCAAG      |
| AP014960.1        | <i>GADPH</i> | GADPH-qPCR-F | CACGGCCACTGGAAGCA         |
| 22937203-22938694 |              | GADPH-qPCR-R | TCCTCAGGGTTCCTGATGCC      |
| CP010914.1        | <i>bE1</i>   | bE1-qPCR-F   | TGAAAGTTCTCATGCAAGCC      |
| 793887-795381     |              | bE1-qPCR-R   | TGAGAGGTTCGATTGAGGTG      |
| CP010914.1        | <i>bW1</i>   | bW1-qPCR-F   | CACGTTGGATCTCGCTCGGT      |
| 795628-797775     |              | bW1-qPCR-R   | TCGGAAGGGAGGACGCAAAC      |
| CP010914.1        | <i>PRA1</i>  | PRA1-qPCR-F  | GCTCCAGTGCCGCAGTAAGT      |
| 859544-860833     |              | PRA1-qPCR-R  | GAATGTGGGCTTGCGTCGTC      |
| CP010918.1        | <i>PRF1</i>  | PRF1-qPCR-F  | GCCACCTCAGCCGTCTATCG      |
| 692187 -694352    |              | PRF1-qPCR-R  | ACTCGCAGTAGCCTTGCTCG      |
| CP010926.1        | <i>RAM1</i>  | RAM1-qPCR-F  | TGAATCGCGACGCCCTCATT      |
| 349030-350847     |              | RAM1-qPCR-R  | GAGGGACCGTGAGCATAACCG     |
| CP010916.1        | <i>ACTIN</i> | ACTIN-qPCR-F | AAGTCGTACGAGCTTCCCGA      |
| 201251-202322     |              | ACTIN-qPCR-R | TACCGGCGTACATGGTGGTA      |
| CP010930.1        | <i>WSC2</i>  | WSC2-qPCR-F  | GCCAACGCGAACCAGATGTG      |
| 484410-489113     |              | WSC2-qPCR-R  | TCTTCGCGCCCAATTGAGGT      |
| CP010915.1        | <i>MID2</i>  | MID2-qPCR-F  | CCTCGTCGTCTCTGCTGAC       |
| 227643-229811     |              | MID2-qPCR-R  | GGCACCGCTGTCATCATCCT      |
| CP010916.1        | <i>ROM2</i>  | ROM2-qPCR-F  | CCGACACGCTTGGACCAGAT      |
| 575076-580106     |              | ROM2-qPCR-R  | ACGACGAGGTGACAGTGCTG      |
| CP010933.1        | <i>RHO1</i>  | RHO1-qPCR-F  | TCCCCATCATCCTCGTCGGT      |
| 199191-200160     |              | RHO1-qPCR-R  | GCTCAAACACTTCGCGCACA      |

|                               |             |                            |                                               |
|-------------------------------|-------------|----------------------------|-----------------------------------------------|
| CP010933.1<br>226099-229827   | <i>PKC1</i> | PKC1-qPCR-F<br>PKC1-qPCR-R | CGGACGCTTGGGAGACATGT<br>GCGACTGTTGCATGTGAGGC  |
| CP010915.1<br>661071-666884   | <i>BCK1</i> | BCK1-qPCR-F<br>BCK1-qPCR-R | AGAACGCGTATGTGGCCCAA<br>CGCGCTCCAAACTCGTTCAC  |
| CP010913.1<br>1237903-1239240 | <i>SLT2</i> | SLT2-qPCR-F<br>SLT2-qPCR-R | TCAGGCGAGGATGATGCAGC<br>CCACTGGCATGCTCCGAGTT  |
| CP010926.1<br>265151-267019   | <i>RLM1</i> | RLM1-qPCR-F<br>RLM1-qPCR-R | GCTCCTTTGTCTGGACCGGTT<br>CAACATGAACAGGCGGCGTT |
| CP010915.1<br>577067-582421   | <i>FKS3</i> | FKS3-qPCR-F<br>FKS3-qPCR-R | AGAAGAAGCGCCTGGGACAC<br>TGGCGGCGTTCCAAACAATG  |
| CP010918.1<br>765032-767347   | <i>SMI1</i> | SMI1-qPCR-F<br>SMI1-qPCR-R | GTGCAATTCGAACAGGGCGG<br>TCGCTGTTCTACGCTGCTCC  |
| CP010915.1<br>322087-327779   | <i>SSK2</i> | SSK2-qPCR-F<br>SSK2-qPCR-R | TGGAGCAACAGCGATACGGG<br>ACTCTCGTCTCCAGCGGACT  |
| CP010914.1<br>930343-931699   | <i>HOG1</i> | HOG1-qPCR-R<br>HOG1-qPCR-F | TTCGTCCAGTCGTTGCCCAA<br>CGGGTTCGTCTAGTAGGGTCG |
